# Supplementary material for: Large offspring syndrome: A bovine model for the human loss-of-imprinting overgrowth syndrome Beckwith-Wiedemann
Source: PubMed Central journal article supplement — Epigenetics. 2013 May 10;8(6):591–601. doi: 10.4161/epi.24655 (PMC3857339; doi:10.4161/epi.24655), 2013-05-10
Supplement: epi-8-591-s01.pdf [file epi-8-591-s01.pdf]

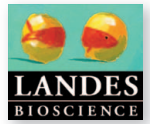

## **Supplemental Material to:**

**Zhiyuan Chen, Katherine Marie Robbins, Kevin Dale Wells  
and Rocio Melissa Rivera**

**Large offspring syndrome: a bovine model for the human  
loss-of-imprinting overgrowth syndrome Beckwith-  
Wiedemann**

**Epigenetics 2013; 8(6)**

**<http://dx.doi.org/10.4161/epi.24655>**

**[http://www.landesbioscience.com/journals/epigenetics/  
article/24655/](http://www.landesbioscience.com/journals/epigenetics/article/24655/)**

**Supplemental Figure 1. Biallelic expression of *KCNQ1OT1* in LOS fetuses.** Shown is Sanger sequencing data of *KCNQ1OT1* RT-PCR product in tissues analyzed in AI-B799 (control), ART-J835LOS and ART-J489ALOS fetuses. The columns show the chromatograph for each tissue of each fetus. Values below the chromatograph are the percentage of *KCNQ1OT1* expressed from the maternal allele. Arrows show the double peaks of SNP2 site (refer to Figure 2) in ART-J835LOS and ART-J489ALOS fetuses. LOS: large offspring syndrome; RT-PCR: reverse transcription-polymerase chain reaction; SNP: single nucleotide polymorphism.

**Supplemental Figure 2. Analysis of *PHLDA2* expression.** (A) The *PHLDA2* RNA was determined by quantitative RT-PCR in several tissues from eight AI fetuses (diamonds; AI), two LOS fetuses with biallelic expression of *KCNQ1OT1* (triangle = ART-J835LOS; square = ART-J489ALOS; bi-LOS), and five LOS fetuses with correct imprinting of *KCNQ1OT1* (circles; mono-LOS). The short line among the diamonds and circles represents the average level of the individuals. *PHLDA2* level was normalized to the expression of *GAPDH*. (B) The threshold cycle (Ct) of *PHLDA2* was normalized to the reference gene *GAPDH* in each tissue from the eight AI fetuses. The data are expressed as mean  $\pm$  SEM. Tissues that do not share the common characters have significant difference (\* $P < 0.05$ ). LOS: large offspring syndrome;

**Supplemental Figure 3. Loss of methylation of KvDMR1 on the maternal allele is associated with biallelic expression of *KCNQ1OT1* in LOS fetuses.** DNA was treated with sodium bisulfite prior to PCR, and PCR product was cloned before sequencing. Sequencing data was used to determine the DNA methylation status at the KvDMR1. Shown on top is a depiction of the 10<sup>th</sup> intron of the maternally-expressed gene *KCNQ1*

and its direction of transcription is shown with an arrow. The region harbors the promoter of the antisense long ncRNA *KCNQIOT1* (shown as dashed arrow), which is also an imprinting control region known as KvDMR1. A 385 bp region of the KvDMR1 was used to determine the DNA methylation status of 37 CpG sites (ovals). A SNP (vertical arrow) between *B. t. indicus* and *B. t. taurus* was used to determine the parental origin of the alleles and only maternal alleles are shown here. Five tissues from two fetuses are shown. Filled and open circles represent methylated and unmethylated CpG dinucleotides, respectively. Missing circles are sequencing data of low quality. Each line denotes an individual DNA strand. The level of maternal *KCNQIOT1* expression is shown in the center and next to the strands. Tail tissues were collected for the purpose of DNA analysis, precluding its use for gene expression determinations. NA: Not available.

**Supplemental Figure 4. KvDMR1 is unmethylated on the paternal alleles.** DNA was treated with sodium bisulfite prior to PCR, and PCR product was cloned before sequencing. Sequencing data was used to determine the DNA methylation status. Only paternal alleles are shown here – maternal allele results can be found in Figure 5 and Supplemental Figure 3. Five tissues from 4 fetuses are shown. Filled and open circles represent methylated and unmethylated CpG dinucleotides, respectively. Missing circles are sequencing data of low quality. Each line denotes an individual DNA strand and the number to the left of the strands represents the number of strands with that phenotype when greater than one.

**Supplemental Figure 5. Differential methylation of the *H19/IGF2* ICR in tail and brain of AI control fetuses.** DNA was treated with sodium bisulfite prior to PCR, and PCR product was cloned before sequencing. Sequencing data was used to determine the DNA methylation status. Shown on top is a depiction of the maternally-expressed gene *H19* (shown as an arrow) and the ICR is represented as a black box in which the vertical lines represent 8 predicted CTCF binding sites (31). A 318 bp region which covers the 5<sup>th</sup> CTCF binding site was used to determine the DNA methylation status of 21/20 CpG sites (ovals). An extra CpG site on paternal alleles is a result of the SNP that “CG” in *B. t. indicus* (paternal) and “CA” in *B. t. taurus* (maternal). A SNP (vertical arrow) between *B. t. indicus* and *B. t. taurus* was used to determine the origin of the parental allele. Two tissues from 2 fetuses are shown. Filled and open circles represent methylated and unmethylated CpG dinucleotides, respectively. Missing circles are sequencing data of low quality. Each line denotes an individual DNA strand.

### **Supplemental Table 1**

The five tables show the calculated allelic expression of *KCNQ1OT1*, *CDKN1C*, *KCNQ1*, *PHLDA2*, *H19* and *IGF2* imprinting status in each tissue for each fetus. *KCNQ1OT1* and *IGF2* are paternally-expressed; and *CDKN1C*, *PHLDA2*, *KCNQ1* and *H19* are maternally-expressed. The six genes are located on chromosome 29. Each table shows the data of one gene. Gene symbol and tissues are listed on the left side of the table (i.e. Liver, Muscle, Brain, Tongue, Heart, Lung, Kidney and Placenta). J835, R868B *et al.*, are fetus numbers, and they are arranged based on fetal body weight from

large to small in ART group. First seven ART fetuses from left to right present with macrosomia (> 97<sup>th</sup> percentile body weight of controls). Sex of each fetus is listed above the fetus numbers. The numbers on the top are bodyweight in grams of each fetus. Two columns show the way (ART or AI) the fetuses were generated. The numbers in the tables are the percentage of mRNA expressed from the normally repressed allele. Only samples that had at least 10% expression from the repressed allele were considered biallelic. For example, the liver of the fetus J835 had biallelic expression of *KCNQ1OT1* (19.7% expression from the paternal allele (normally repressed)) and the liver of the fetus R868B had monoallelic expression of *KCNQ1OT1* (0% expression from the repressed allele). “NE” means expression not detectable based on current methods. A “--” means sample not analyzed. ART= assisted reproductive technologies; AI= artificial insemination; F=female; M=male.

## Supplemental Table 2

1. RT-PCR primers, conditions, allelic expression assay restriction enzymes, digested product size and PAGE concentrations and Real-time PCR probes. NA: not applicable.

2. Primers and conditions for bisulfite converted KvDMR1, *CDKN1C* exon 2, and *H19/IGF2* ICR. NA: not applicable.

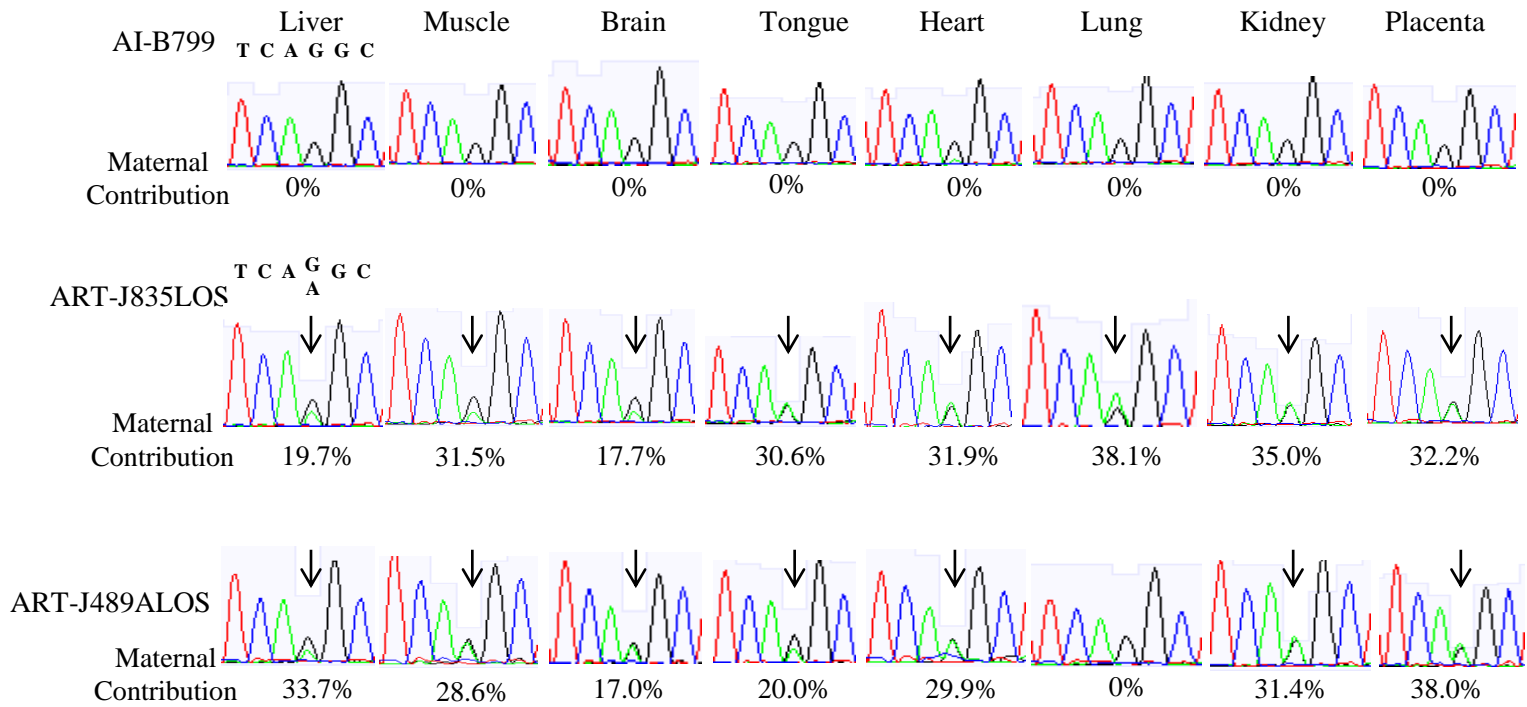

Supplemental Figure 1

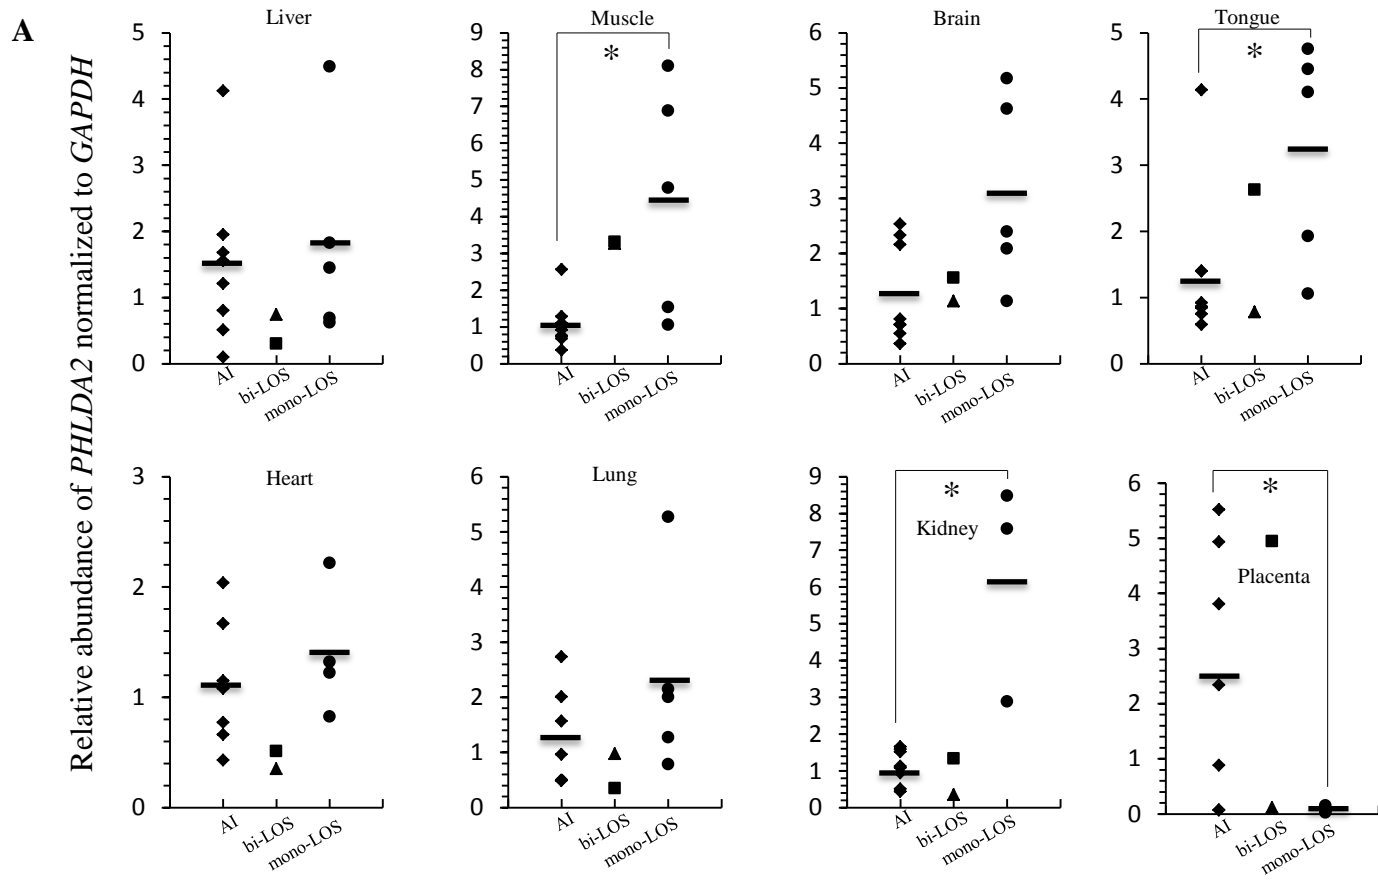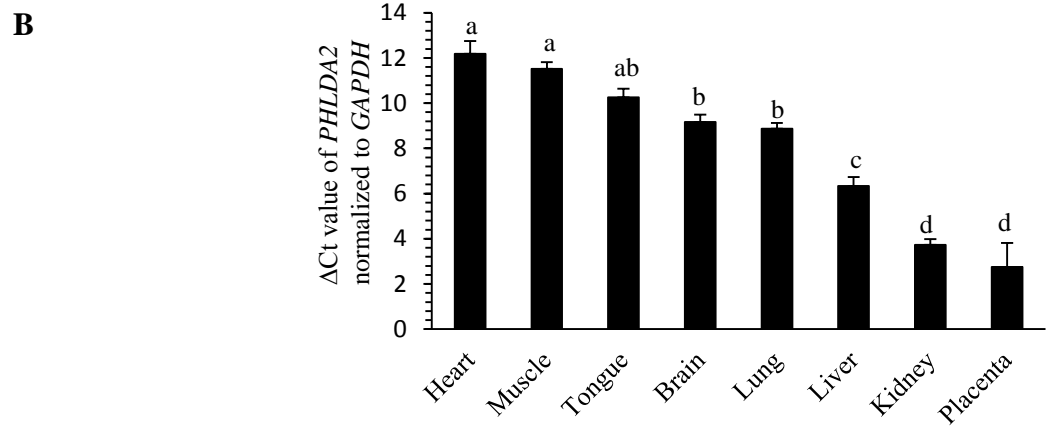

Supplemental Figure 2

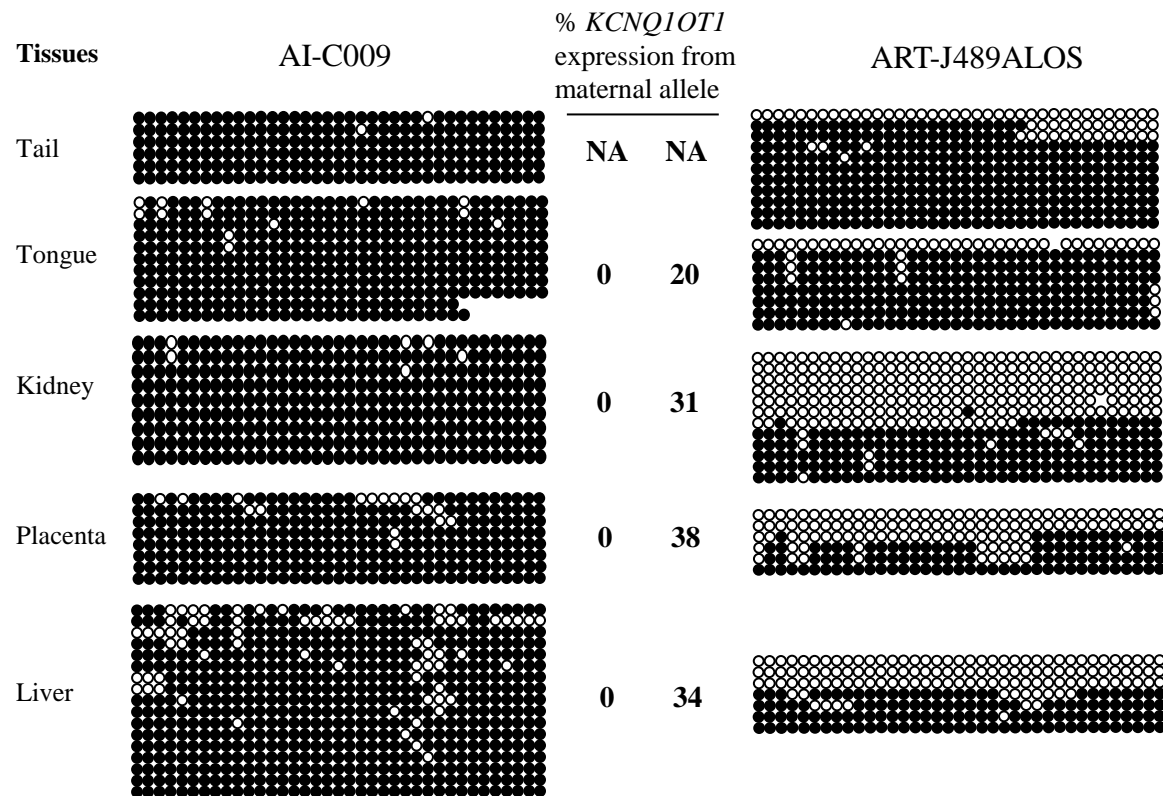

Supplemental Figure 3



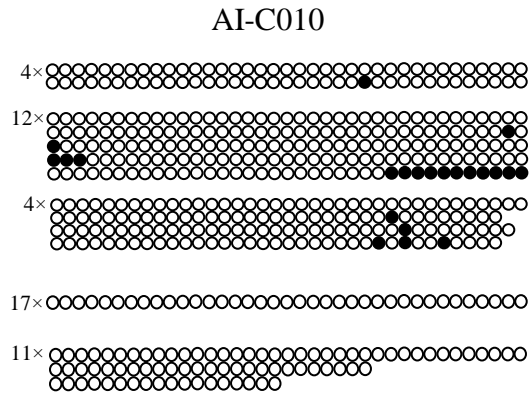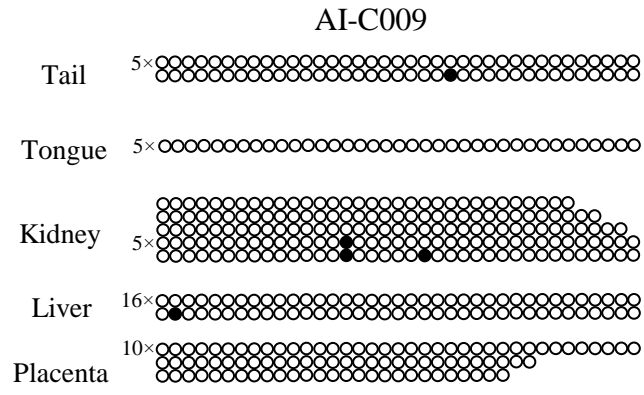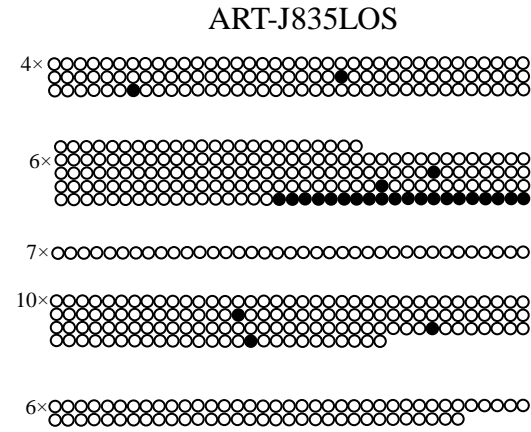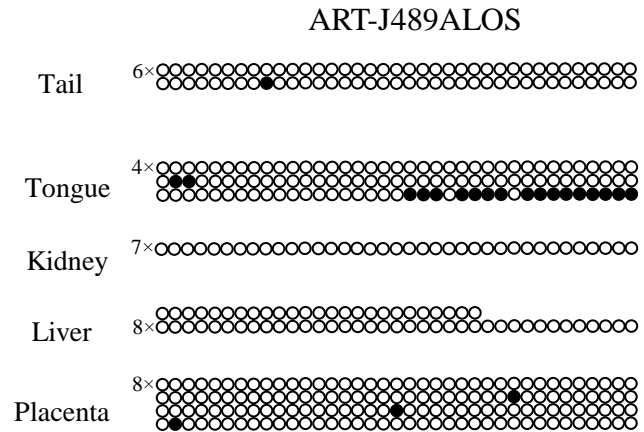

Supplemental Figure 4

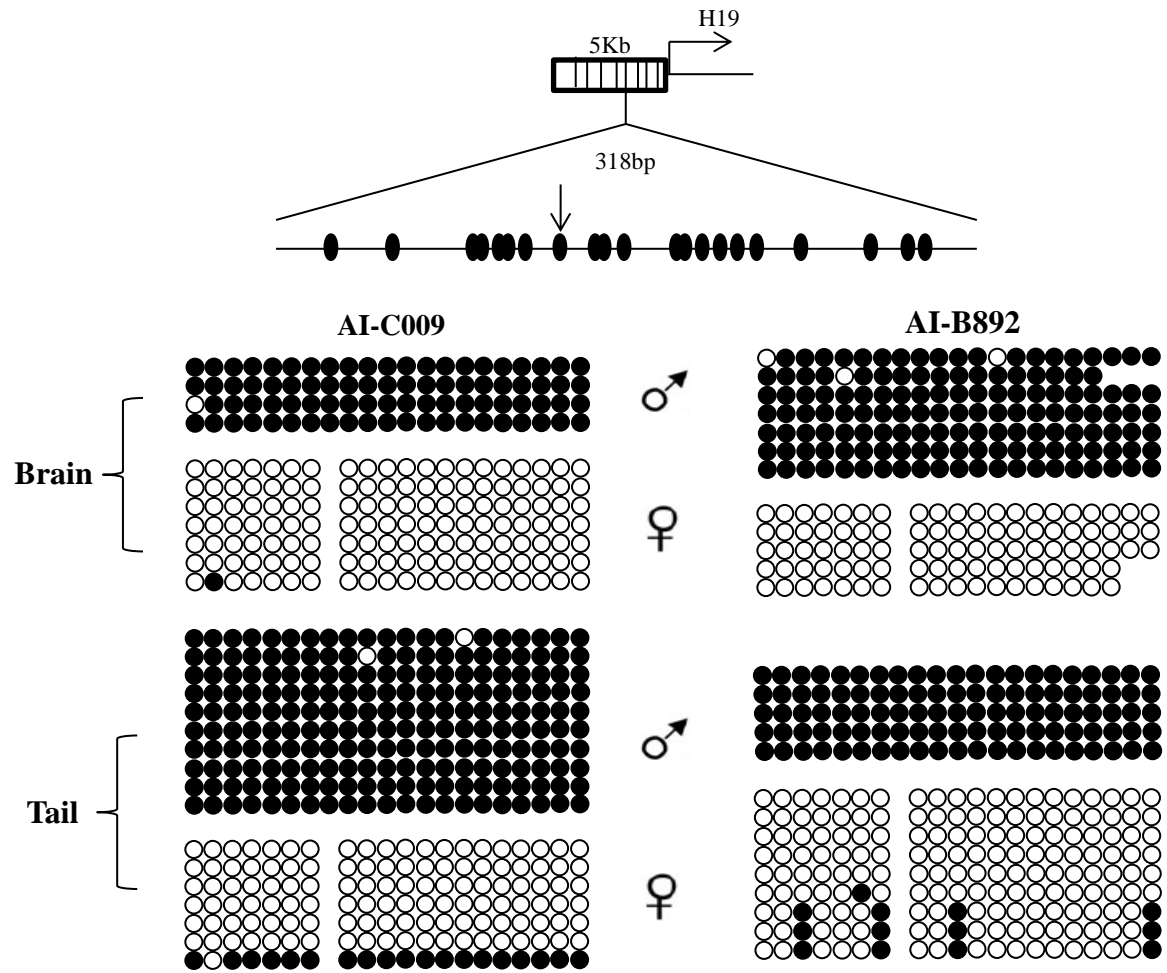

Supplemental Figure 5

| <b>KCNQ1OT1</b>   | <b>ART</b>      |       |       |      |       |      |       |                 |       |       |      |      |      |       |       |      |       |       |       |       |       |       |      |      |      |      |       |  |
|-------------------|-----------------|-------|-------|------|-------|------|-------|-----------------|-------|-------|------|------|------|-------|-------|------|-------|-------|-------|-------|-------|-------|------|------|------|------|-------|--|
|                   | >97% bodyweight |       |       |      |       |      |       | <97% bodyweight |       |       |      |      |      |       |       |      |       |       |       |       |       |       |      |      |      |      |       |  |
| <b>Bodyweight</b> | 714g            | 620g  | 584g  | 518g | 514g  | 482g | 478g  | 474g            | 472g  | 466g  | 466g | 464g | 462g | 460g  | 432g  | 430g | 428g  | 422g  | 420g  | 410g  | 400g  | 390g  | 376g | 372g | 360g | 352g | 352g  |  |
| <b>Sex</b>        | F               | F     | M     | F    | F     | M    | M     | M               | M     | M     | F    | M    | M    | M     | M     | M    | M     | M     | M     | M     | M     | F     | F    | M    | F    | F    | F     |  |
| <b>Fetus No#</b>  | J835            | R868B | J183b | J355 | J489A | K120 | K290b | K169b           | J183A | J498A | R893 | K282 | K075 | J817A | R868A | K525 | K169A | J566a | J566b | K290A | J498b | J817b | J619 | K648 | J649 | 6312 | J489b |  |
| <b>Liver</b>      | 19.7            | 0     | 0     | 0    | 33.7  | 0    | 0     | 0               | 0     | 0     | 0    | 0    | 0    | 0     | 0     | 0    | 0     | 0     | 0     | 0     | 0     | 0     | 0    | 0    | 0    | 0    | 0     |  |
| <b>Muscle</b>     | 31.5            | 0     | 0     | 0    | 28.6  | 0    | 0     | 0               | 0     | 0     | 0    | 0    | 0    | 0     | 0     | 0    | 0     | 0     | 0     | 0     | 0     | 0     | 0    | 0    | 0    | 0    | 0     |  |
| <b>Brain</b>      | 17.7            | 0     | 0     | 0    | 17.0  | 0    | 0     | 0               | 0     | 0     | 0    | 0    | 0    | 0     | 0     | 0    | 0     | 0     | 0     | 0     | 0     | 0     | 0    | 0    | 0    | 0    | 0     |  |
| <b>Tongue</b>     | 30.6            | 0     | 0     | 0    | 20.0  | 0    | 0     | 0               | 0     | 0     | 0    | 0    | 0    | 0     | 0     | 0    | 0     | 0     | 0     | 0     | 0     | 0     | 0    | 0    | 0    | 0    | 0     |  |
| <b>Heart</b>      | 31.9            | 0     | 0     | 0    | 29.9  | 0    | 0     | 0               | 0     | 0     | 0    | 0    | 0    | 0     | 0     | 0    | 0     | 0     | 0     | 0     | 0     | 0     | 0    | 0    | 0    | 0    | 0     |  |
| <b>Lung</b>       | 38.1            | 0     | 0     | 0    | 0     | 0    | 0     | 0               | 0     | 0     | 0    | 0    | 0    | 0     | 0     | 0    | 0     | 0     | 0     | 0     | 0     | 0     | 0    | 0    | 0    | 0    | 0     |  |
| <b>Kidney</b>     | 35.0            | 0     | 0     | 0    | 31.4  | 0    | 0     | 0               | 0     | 0     | 0    | 0    | 0    | 0     | 0     | 0    | 0     | 0     | 0     | 0     | 0     | 0     | 0    | 0    | 0    | 0    | 0     |  |
| <b>Placenta</b>   | 32.2            | 0     | 0     | 0    | 38.0  | 0    | 0     | 0               | 0     | 0     | 0    | 0    | 0    | 0     | 0     | 0    | 0     | 0     | 0     | 0     | 0     | 0     | 0    | 0    | 0    | 0    | --    |  |

| <b>KCNQ1OT1</b>   | <b>AI</b> |      |      |      |      |      |
|-------------------|-----------|------|------|------|------|------|
|                   | >97%      | <97% |      |      |      |      |
| <b>Bodyweight</b> | 496g      | 416g | 410g | 408g | 404g | 380g |
| <b>Sex</b>        | M         | F    | M    | F    | F    | M    |
| <b>Fetus No#</b>  | C010      | C009 | C002 | B799 | B892 | B773 |
| <b>Liver</b>      | 0         | 0    | 0    | 0    | 0    | 0    |
| <b>Muscle</b>     | 0         | 0    | 0    | 0    | 0    | 0    |
| <b>Brain</b>      | 0         | 0    | 0    | 0    | 0    | 0    |
| <b>Tongue</b>     | 0         | 0    | 0    | 0    | 0    | 0    |
| <b>Heart</b>      | 0         | 0    | 0    | 0    | 0    | 0    |
| <b>Lung</b>       | 0         | 0    | 0    | 0    | 0    | 0    |
| <b>Kidney</b>     | 0         | 0    | 0    | 0    | 0    | 0    |
| <b>Placenta</b>   | 0         | 0    | 0    | 0    | 0    | 0    |

Supplemental Table S1.1

| <b>CDKN1C</b>    | <b>ART</b>        |       |       |      |       |      |       |                 |       |      |      |      |       |      |       |       |       |       |      |      |      |      |       |
|------------------|-------------------|-------|-------|------|-------|------|-------|-----------------|-------|------|------|------|-------|------|-------|-------|-------|-------|------|------|------|------|-------|
|                  | >97% bodyweight   |       |       |      |       |      |       | <97% bodyweight |       |      |      |      |       |      |       |       |       |       |      |      |      |      |       |
|                  | <b>Bodyweight</b> | 714g  | 620g  | 584g | 518g  | 514g | 482g  | 478g            | 474g  | 466g | 466g | 464g | 462g  | 460g | 430g  | 422g  | 420g  | 410g  | 390g | 376g | 372g | 360g | 352g  |
| <b>Sex</b>       | F                 | F     | M     | F    | F     | M    | M     | M               | M     | F    | M    | M    | M     | M    | M     | M     | M     | F     | F    | M    | F    | F    | F     |
| <b>Fetus No#</b> | J835              | R868B | J183b | J355 | J489A | K120 | K290b | K169b           | J498A | R893 | K282 | K075 | J817A | K525 | J566a | J566b | K290A | J817b | J619 | K648 | J649 | 6312 | J489b |
| <b>Liver</b>     | 0                 | 0     | 0     | 0    | 19.9  | 0    | 0     | 0               | 0     | 0    | 0    | 0    | 0     | 0    | 0     | 0     | 11.6  | 0     | 0    | 0    | 0    | 0    | 0     |
| <b>Muscle</b>    | 0                 | 0     | 0     | 0    | 0     | 0    | 0     | 0               | 0     | 0    | 0    | 0    | 0     | 0    | 0     | 0     | 0     | 0     | 0    | 0    | 0    | 0    | 0     |
| <b>Brain</b>     | 12.4              | 35.2  | 16.9  | 38.0 | 12.7  | 19.1 | 20.3  | 21.6            | 27.0  | 20.2 | 25.5 | 11.8 | 14.6  | 18.5 | 27.3  | 28.3  | 27.8  | 31.5  | 19.9 | 23.8 | 25.0 | 17.4 | 21.5  |
| <b>Tongue</b>    | 0                 | 0     | 0     | 0    | 0     | 0    | 0     | 0               | 0     | 0    | 0    | 0    | 0     | 0    | 0     | 0     | 0     | 0     | 0    | 0    | 0    | 0    | 0     |
| <b>Heart</b>     | 0                 | 0     | 0     | 20.2 | 0     | 0    | 0     | 0               | 0     | 0    | 0    | 0    | 0     | 0    | 0     | 0     | 0     | 0     | 0    | 0    | 0    | 0    | 0     |
| <b>Lung</b>      | 0                 | 0     | 11.7  | 0    | 0     | 0    | 0     | 0               | 0     | 0    | 0    | 0    | 0     | 0    | 12.9  | 0     | 0     | 10.6  | 0    | 0    | 0    | 0    | 0     |
| <b>Kidney</b>    | 16.7              | 0     | 0     | 0    | 0     | 0    | 0     | 0               | 0     | 0    | 0    | 0    | 0     | 0    | 0     | 0     | 0     | 0     | 0    | 0    | 0    | 0    | 0     |
| <b>Placenta</b>  | 0                 | 0     | 0     | NE   | 0     | 0    | 0     | 0               | 0     | 0    | 0    | 0    | 0     | 0    | 0     | 0     | 0     | NE    | 0    | 0    | 0    | 0    | --    |

| <b>CDKN1C</b>    | <b>AI</b>         |      |      |      |      |      |
|------------------|-------------------|------|------|------|------|------|
|                  | >97%              | <97% |      |      |      |      |
|                  | <b>Bodyweight</b> | 496g | 416g | 410g | 408g | 410g |
| <b>Sex</b>       | M                 | F    | M    | F    | F    | M    |
| <b>Fetus No#</b> | C010              | C009 | C002 | B799 | B892 | B773 |
| <b>Liver</b>     | 0                 | 0    | 0    | 0    | 0    | 0    |
| <b>Muscle</b>    | 0                 | 0    | 0    | 0    | 0    | 0    |
| <b>Brain</b>     | 22.0              | 16.1 | 15.7 | 23.2 | 23.2 | 27.7 |
| <b>Tongue</b>    | 0                 | 0    | 0    | 0    | 0    | 0    |
| <b>Heart</b>     | 0                 | 0    | 0    | 0    | 0    | 0    |
| <b>Lung</b>      | 15.5              | 0    | 0    | 15.7 | 0    | 0    |
| <b>Kidney</b>    | 0                 | 0    | 0    | 0    | 0    | 0    |
| <b>Placenta</b>  | 0                 | 0    | 0    | 0    | 0    | 0    |

Supplemental Table S1.2

|                   | ART             |       |       |      |       |      |       |                 |       |      |      |      |       |      |       |       |       |       |      |      |      |      |       |
|-------------------|-----------------|-------|-------|------|-------|------|-------|-----------------|-------|------|------|------|-------|------|-------|-------|-------|-------|------|------|------|------|-------|
| <b>KCNQ1</b>      | >97% bodyweight |       |       |      |       |      |       | <97% bodyweight |       |      |      |      |       |      |       |       |       |       |      |      |      |      |       |
| <b>Bodyweight</b> | 714g            | 620g  | 584g  | 518g | 514g  | 482g | 478g  | 474g            | 466g  | 466g | 464g | 462g | 460g  | 430g | 422g  | 420g  | 410g  | 390g  | 376g | 372g | 360g | 352g | 352g  |
| <b>Sex</b>        | F               | F     | M     | F    | F     | M    | M     | M               | M     | F    | M    | M    | M     | M    | M     | M     | M     | F     | F    | M    | F    | F    | F     |
| <b>Fetus No#</b>  | J835            | R868B | J183b | J355 | J489A | K120 | K290b | K169b           | J498A | R893 | K282 | K075 | J817A | K525 | J566a | J566b | K290A | J817b | J619 | K648 | J649 | 6312 | J489b |
| <b>Liver</b>      | 0               | 0     | 13.0  | 14.9 | 0     | 0    | 15.3  | 22.0            | 14.1  | 12.5 | 0    | 20.1 | 16.2  | 20.5 | 0     | 0     | 12.5  | 15.2  | 18.1 | 15.6 | 11.0 | 0    | 16.4  |
| <b>Muscle</b>     | 20.6            | 10.0  | 23.2  | 20.0 | 29.4  | 18.6 | 13.6  | 11.2            | 22.8  | 12.1 | 0    | 17.9 | 20.6  | 17.3 | 22.0  | 22.0  | 10.8  | 12.9  | 14.8 | 11.6 | 18.5 | 0    | 18.5  |
| <b>Brain</b>      | 29.9            | 19.7  | 41.1  | 36.2 | 42.9  | 41.3 | 37.6  | 38.8            | 35.2  | 28.5 | 20.9 | 15.2 | 38.0  | 44.9 | 31.4  | 16.7  | 44.4  | 30.4  | 34.8 | 43.8 | 35.8 | 23.8 | 33.0  |
| <b>Tongue</b>     | 13.7            | 21.6  | 17.6  | 25.2 | 27.0  | 17.0 | 26.7  | 19.9            | 22.2  | 14.4 | 10.6 | 23.8 | 10.0  | 24.8 | 0     | 17.3  | 20.9  | 17.7  | 9.8  | 18.3 | 14.6 | 16.8 | 28.0  |
| <b>Heart</b>      | 23.8            | 27.2  | 26.3  | 13.6 | 31.3  | 27.0 | 31.6  | 34.2            | 29.7  | 23.2 | 23.0 | 27.7 | 29.5  | 30.4 | 32.4  | 26.9  | 31.4  | 27.9  | 30.6 | 37.7 | 31.9 | 35.1 | 28.8  |
| <b>Lung</b>       | 13.1            | 0     | 28.0  | 0    | 17.8  | 16.3 | 16.2  | 20.0            | 0     | 10.9 | 14.1 | 20.8 | 18.4  | 19.0 | 16.7  | 15.6  | 15.2  | 0     | 19.7 | 0    | 21.3 | 0    | 17.5  |
| <b>Kidney</b>     | 20.7            | 0     | 0     | 17.3 | 35.4  | 20.0 | 18.1  | 16.0            | 13.9  | 22.7 | 13.3 | 0    | 23.0  | 12.5 | 18.5  | 20.3  | 20.7  | 0     | 11.9 | 0    | 28.2 | 17.8 | 11.3  |
| <b>Placenta</b>   | 22.3            | 0     | 0     | NE   | 46.9  | 14.3 | 0     | 35.4            | 0     | 23.8 | 0    | 38.0 | 23.3  | 26.2 | 38.0  | 14.3  | 30.6  | 0     | 34.0 | 21.1 | 0    | 38.5 | --    |

|                   | AI   |      |      |      |      |      |
|-------------------|------|------|------|------|------|------|
| <b>KCNQ1</b>      | >97% | <97% |      |      |      |      |
| <b>Bodyweight</b> | 496g | 416g | 410g | 408g | 410g | 380g |
| <b>Sex</b>        | M    | F    | M    | F    | F    | M    |
| <b>Fetus No#</b>  | C010 | C009 | C002 | B799 | B892 | B773 |
| <b>Liver</b>      | 0    | 10.5 | 0    | 0    | 0    | 0    |
| <b>Muscle</b>     | 0    | 16.7 | 16.4 | 14.3 | 0    | 13.5 |
| <b>Brain</b>      | 23.5 | 15.9 | 14.7 | 26.7 | 28.1 | 37.8 |
| <b>Tongue</b>     | 26.5 | 15.0 | 0    | 0    | 26.4 | 16.9 |
| <b>Heart</b>      | 27.7 | 14.8 | 23.6 | 19.3 | 25.9 | 25.1 |
| <b>Lung</b>       | 11.2 | 19.4 | 0    | 0    | 20.6 | 15.0 |
| <b>Kidney</b>     | 0    | 16.2 | 0    | 0    | 13.5 | 15.0 |
| <b>Placenta</b>   | 47.2 | 0    | 12.3 | 39.3 | 28.5 | 14.4 |

Supplemental Table S1.3

|                   | ART             |       |       |      |       |      |       |       |      |      |  |
|-------------------|-----------------|-------|-------|------|-------|------|-------|-------|------|------|--|
| <b>PHLDA2</b>     | >97% bodyweight |       |       |      |       |      |       | <97%  |      |      |  |
| <b>Bodyweight</b> | 714g            | 620g  | 584g  | 518g | 514g  | 482g | 478g  | 390g  | 372g | 360g |  |
| <b>Sex</b>        | F               | F     | M     | F    | F     | M    | M     | F     | M    | F    |  |
| <b>Fetus No#</b>  | J835            | R868B | J183b | J355 | J489A | K120 | K290b | J817b | K648 | J649 |  |
| <b>Liver</b>      | 0               | 0     | 0     | 0    | 0     | 0    | 0     | 0     | 0    | 0    |  |
| <b>Muscle</b>     | 0               | 35.3  | 50.0  | 35.1 | 37.6  | 0    | 0     | 19.9  | 0    | 100  |  |
| <b>Brain</b>      | 80.0            | 36.3  | 17.0  | 41.3 | 100   | 70.5 | 45.0  | 55.7  | 0    | 47.3 |  |
| <b>Tongue</b>     | 100             | 0     | 0     | 0    | 0     | 0    | 39.3  | 29.5  | 100  | 0    |  |
| <b>Heart</b>      | 0               | 0     | 0     | 20.1 | 0     | 0    | 35.1  | 34.7  | 0    | 13.8 |  |
| <b>Lung</b>       | 51.9            | 51.3  | 0     | 55.3 | 0     | 0    | 100   | 0     | 0    | 12.3 |  |
| <b>Kidney</b>     | 18.7            | 0     | 9.8   | 12.7 | 21.0  | 0    | 15.1  | 20.0  | 0    | 13.8 |  |
| <b>Placenta</b>   | 0               | 0     | 0     | 0    | 0     | 0    | 0     | NE    | 0    | 0    |  |

|                   | AI   |      |      |      |      |      |
|-------------------|------|------|------|------|------|------|
| <b>PHLDA2</b>     | >97% | <97% |      |      |      |      |
| <b>Bodyweight</b> | 496g | 416g | 410g | 408g | 404g | 380g |
| <b>Sex</b>        | M    | F    | M    | F    | F    | M    |
| <b>Fetus No#</b>  | C010 | C009 | C002 | B799 | B892 | B773 |
| <b>Liver</b>      | 0    | 0    | 0    | 0    | 0    | 0    |
| <b>Muscle</b>     | 0    | 0    | 0    | 35.3 | 22.4 | 0    |
| <b>Brain</b>      | 67.9 | 0    | 40.4 | 29.4 | 53.0 | 0    |
| <b>Tongue</b>     | 33.4 | 100  | 0    | 41.4 | 0    | 32.2 |
| <b>Heart</b>      | 58.1 | 83.1 | 0    | 100  | 48.9 | 100  |
| <b>Lung</b>       | 51.6 | 0    | 64.4 | 0    | 0    | 0    |
| <b>Kidney</b>     | 30.5 | 19.4 | 26.2 | 21.8 | 12.5 | 41.4 |
| <b>Placenta</b>   | 0    | 0    | 0    | 0    | 0    | 0    |

|                   | ART  |       |       |      |       |      |       |       |       |      |      |      |      |      |
|-------------------|------|-------|-------|------|-------|------|-------|-------|-------|------|------|------|------|------|
| <b>IGF2</b>       | >97% |       |       |      |       |      |       | <97%  |       |      |      |      |      |      |
| <b>Bodyweight</b> | 714g | 620g  | 584g  | 518g | 514g  | 482g | 478g  | 474g  | 466g  | 466g | 464g | 462g | 372g | 352g |
| <b>Sex</b>        | F    | F     | M     | F    | F     | M    | M     | M     | M     | F    | M    | M    | M    | F    |
| <b>Fetus No#</b>  | J835 | R868B | J183b | J355 | J489A | K120 | K290b | K169b | J498A | R893 | K282 | K075 | K648 | 6312 |
| <b>Liver</b>      | 0    | 0     | 0     | 0    | 0     | 0    | 0     | 0     | 0     | 0    | 0    | 0    | 0    | 0    |
| <b>Muscle</b>     | 0    | 0     | 0     | 0    | 0     | 0    | 0     | 0     | 0     | 0    | 0    | 0    | 0    | 0    |
| <b>Brain</b>      | 24.3 | 24.6  | 35.5  | 25.8 | 26.1  | 30.1 | 25.3  | 34.1  | 13.6  | 0    | 14.0 | 9.3  | 0    | 0    |
| <b>Tongue</b>     | 0    | 0     | 0     | 0    | 0     | 0    | 0     | 0     | 0     | 0    | 0    | 0    | 0    | 0    |
| <b>Heart</b>      | 0    | 0     | 0     | 0    | 0     | 0    | 0     | 0     | 0     | 0    | 0    | 0    | 0    | 0    |
| <b>Lung</b>       | 0    | 0     | 0     | 0    | 0     | 0    | 0     | 0     | 0     | 0    | 0    | 0    | 0    | 0    |
| <b>Kidney</b>     | 0    | 0     | 0     | 0    | 0     | 0    | 0     | 0     | 0     | 0    | 0    | 0    | 0    | 0    |
| <b>Placenta</b>   | 0    | 0     | 0     | 0    | 0     | 0    | 0     | 0     | 0     | 0    | 0    | 0    | 0    | 0    |

|                   | AI   |      |      |      |      |
|-------------------|------|------|------|------|------|
| <b>IGF2</b>       | >97% | <97% |      |      |      |
| <b>Bodyweight</b> | 496g | 416g | 404g | 392g | 380g |
| <b>Sex</b>        | M    | F    | F    | F    | M    |
| <b>Fetus No#</b>  | C010 | C009 | B892 | B783 | B773 |
| <b>Liver</b>      | 0    | 0    | 0    | 0    | 0    |
| <b>Muscle</b>     | 0    | 0    | 0    | 0    | 0    |
| <b>Brain</b>      | NE   | 38.9 | 32.2 | 0    | 39.2 |
| <b>Tongue</b>     | 0    | 0    | 0    | 0    | 0    |
| <b>Heart</b>      | 0    | 0    | 0    | 0    | 0    |
| <b>Lung</b>       | 0    | 0    | 0    | 0    | 0    |
| <b>Kidney</b>     | 0    | 0    | 0    | 0    | 0    |
| <b>Placenta</b>   | 0    | 0    | 0    | 0    | 0    |

Supplemental Table S1.4

|                   | ART             |       |       |      |       |      |       |                 |       |      |      |      |       |      |       |       |       |       |      |      |      |      |       |
|-------------------|-----------------|-------|-------|------|-------|------|-------|-----------------|-------|------|------|------|-------|------|-------|-------|-------|-------|------|------|------|------|-------|
| <b>H19</b>        | >97% bodyweight |       |       |      |       |      |       | <97% bodyweight |       |      |      |      |       |      |       |       |       |       |      |      |      |      |       |
| <b>Bodyweight</b> | 714g            | 620g  | 584g  | 518g | 514g  | 482g | 478g  | 474g            | 466g  | 466g | 464g | 462g | 460g  | 430g | 422g  | 420g  | 410g  | 390g  | 376g | 372g | 360g | 352g | 352g  |
| <b>Sex</b>        | F               | F     | M     | F    | F     | M    | M     | M               | M     | F    | M    | M    | M     | M    | M     | M     | M     | F     | F    | M    | F    | F    | F     |
| <b>Fetus No#</b>  | J835            | R868B | J183b | J355 | J489A | K120 | K290b | K169b           | J498A | R893 | K282 | K075 | J817A | K525 | J566a | J566b | K290A | J817b | J619 | K648 | J649 | 6312 | J489b |
| <b>Liver</b>      | 0               | 0     | 0     | 0    | 0     | 0    | 0     | 0               | 0     | 0    | 0    | 0    | 0     | 0    | 0     | 0     | 0     | 0     | 0    | 0    | 0    | 0    | 0     |
| <b>Muscle</b>     | 0               | 0     | 0     | 0    | 0     | 0    | 0     | 0               | 0     | 0    | 0    | 0    | 0     | 0    | 0     | 0     | 0     | 0     | 0    | 0    | 0    | 0    | 0     |
| <b>Brain</b>      | 0               | 0     | 0     | 0    | 0     | NE   | 0     | 0               | 0     | 0    | 0    | 0    | 0     | 0    | 0     | 0     | 0     | NE    | 0    | 0    | 0    | NE   | 0     |
| <b>Tongue</b>     | 0               | 0     | 0     | 0    | 0     | 0    | 0     | 0               | 0     | 0    | 0    | 0    | 0     | 0    | 0     | 0     | 0     | 0     | 0    | 0    | 0    | 0    | 0     |
| <b>Heart</b>      | 0               | 0     | 0     | 0    | 0     | 0    | 0     | 0               | 0     | 0    | 0    | 0    | 0     | 0    | 0     | 0     | 0     | 0     | 0    | 0    | 0    | 0    | 0     |
| <b>Lung</b>       | 0               | 0     | 0     | 0    | 0     | 0    | 0     | 0               | 0     | 0    | 0    | 0    | 0     | 0    | 0     | 0     | 0     | 0     | 0    | 0    | 0    | 0    | 0     |
| <b>Kidney</b>     | 0               | 0     | 0     | 0    | 0     | 0    | 0     | 0               | 0     | 0    | 0    | 0    | 0     | 0    | 0     | 0     | 0     | 0     | 0    | 0    | 0    | 0    | 0     |
| <b>Placenta</b>   | 0               | 0     | 0     | 0    | 0     | 0    | 0     | 0               | 0     | 0    | 0    | 0    | 0     | 0    | 0     | 0     | 0     | 0     | 0    | 0    | 0    | 0    | --    |

|                   | AI   |      |      |      |      |      |
|-------------------|------|------|------|------|------|------|
| <b>H19</b>        | >97% | <97% |      |      |      |      |
| <b>Bodyweight</b> | 496g | 416g | 410g | 408g | 404g | 380g |
| <b>Sex</b>        | M    | F    | M    | F    | F    | M    |
| <b>Fetus No#</b>  | C010 | C009 | C002 | B799 | B892 | B773 |
| <b>Liver</b>      | 0    | 0    | 0    | 0    | 0    | 0    |
| <b>Muscle</b>     | 0    | 0    | 0    | 0    | 0    | 0    |
| <b>Brain</b>      | 0    | 0    | 0    | 0    | 0    | 0    |
| <b>Tongue</b>     | 0    | 0    | 0    | 0    | 0    | 0    |
| <b>Heart</b>      | 0    | 0    | 0    | 0    | 0    | 0    |
| <b>Lung</b>       | 0    | 0    | 0    | 0    | 0    | 0    |
| <b>Kidney</b>     | 0    | 0    | 0    | 0    | 0    | 0    |
| <b>Placenta</b>   | 0    | 0    | 0    | 0    | 0    | 0    |

Supplemental Table S1.5

| Gene Symbol     | SNP information                    |              |             | Primers (5 → 3)                       | PCR annealing Temp (°C) | PCR amplicon size (bp) | Expressed allele | Restriction enzyme | Digested Indicus allele (bp) | Digested Taurus allele (bp) | PAGE(%) |
|-----------------|------------------------------------|--------------|-------------|---------------------------------------|-------------------------|------------------------|------------------|--------------------|------------------------------|-----------------------------|---------|
|                 | NCBI Accession No#                 | Bos. Indicus | Bos. Taurus |                                       |                         |                        |                  |                    |                              |                             |         |
| <i>KCNQ1OT1</i> | NW_003104648.1<br>2971334, 2971399 | G, G         | C, A        | Forward: TTCTTCCAAGGCTGCCAGAAA        | 60.7                    | 460                    | Paternal         | NA<br>Sanger Seq   | NA                           | NA                          | NA      |
|                 |                                    |              |             | Reverse: TCTGCTCTTCCAGCTGTAGTT        |                         |                        |                  |                    |                              |                             |         |
| <i>CDKN1C</i>   | NW_003104648.1<br>2777626          | T            | C           | Forward: ATGAGAGCTCGTGCTCAAAGA        | 60.7                    | 443                    | Maternal         | AvalI              | 232, 133, 78                 | 365, 78                     | 7%      |
|                 |                                    |              |             | Reverse: AGTGAGGTGCCTTTGGCATAACCA     |                         |                        |                  |                    |                              |                             |         |
| <i>KCNQ1</i>    | NW_003104648.1<br>3083541          | A            | G           | Forward: ATCTATGTCCGGAAGCCGTC         | 59.5                    | 300                    | Maternal         | Ddel               | 142, 89, 50,<br>19           | 231, 50, 19,                | 7%      |
|                 |                                    |              |             | Reverse: ATCCAGGTCCAGGTCCTCA          |                         |                        |                  |                    |                              |                             |         |
| <i>PHLDA2</i>   | NW_003104648.1<br>2737363          | A            | G           | Forward: AATTGCTGACCAGGGCAAGGAT       | 61.6                    | 207                    | Maternal         | NA<br>SSCP         | NA                           | NA                          | 8%      |
|                 |                                    |              |             | Reverse: CCGAGTGCTTTATTGGAATGGTGG     |                         |                        |                  |                    |                              |                             |         |
| <i>H19</i>      | NW_003104648.1<br>3559835          | T            | C           | Forward: GATATGGTCCGGTGTGATGGAGAGAGCA | 62.8                    | 752                    | Maternal         | BsiHKAI            | 609, 108, 35                 | 609,143                     | 18%     |
|                 |                                    |              |             | Reverse: TTCGGAGCCTCCAGACTCGGTG       |                         |                        |                  |                    |                              |                             |         |
| <i>IGF2</i>     | NW_003104648.1<br>3471637          | T            | C           | Forward: TTTCTGACCGCTGGGTCGCTT        | 62.0                    | 172                    | Paternal         | NA<br>SSCP         | NA                           | NA                          | 8%      |
|                 |                                    |              |             | Reverse: AGCTCACTAGTCGGGCTGC          |                         |                        |                  |                    |                              |                             |         |

| Real-Time Taqman Probe |               |
|------------------------|---------------|
| <i>CDKN1C</i>          | Bt03250987_m1 |
| <i>PHLDA2</i>          | Bt03249477_g1 |
| <i>IGF2</i>            | Bt03259226_m1 |
| <i>GAPDH</i>           | Bt03210913_g1 |

## Supplemental Table S2.1



| DMR Symbol   | SNP information           |                     |                    | Primers (5 → 3)                    | PCR annealing Temp (°C) | Betaine | MgCl <sub>2</sub> | PCR amplicon size (bp) |
|--------------|---------------------------|---------------------|--------------------|------------------------------------|-------------------------|---------|-------------------|------------------------|
|              | NCBI Accession No#        | <i>Bos. Indicus</i> | <i>Bos. Taurus</i> |                                    |                         |         |                   |                        |
| KvDMR1       | NW_003104648.1<br>2960379 | C                   | G                  | Forward: GTGAGGAGTATGGTATTGAGG     | 62.1                    | NA      | 4mM               | 385                    |
|              |                           |                     |                    | Reverse: TCAACCCTCTCAACCAATAAC     |                         |         |                   |                        |
| CDKN1Cexon2  | NA                        | NA                  | NA                 | Forward: GGGATTATAATTTTAGTTGGATATG | 58.8                    | NA      | 4mM               | 363                    |
|              |                           |                     |                    | Reverse: GCCCCGAAATCCCTAAATAC      |                         |         |                   |                        |
| H19/IGF2 ICR | NW_003104648.1<br>3556134 | G                   | A                  | Forward: AGTGTGTAGAGGATATTGG       | 53.6                    | 1M      | 4mM               | 318                    |
|              |                           |                     |                    | Reverse: CTCCTCTCCTAACTTCAAC       |                         |         |                   |                        |

Supplemental Table S2.2
